# Supplementary material for: Exploration of the Antimicrobial Effects of Benzothiazolylthiazolidin-4-One and In Silico Mechanistic Investigation
Source: MDPI journal article supplement (doi:10.3390/molecules26134061), 2021-07-02
Supplement: s1 [file s1]

# Exploration of the Antimicrobial Effects of Benzothiazolylthiazolidin-4-One and In Silico Mechanistic Investigation

Michelyne Haroun <sup>1,\*</sup>, Christophe Tratat <sup>1</sup>, Anthi Petrou <sup>2</sup>, Athina Geronikaki <sup>2,\*</sup>, Marija Ivanov <sup>3</sup>, Ana Ćirić <sup>3</sup>, Marina Soković <sup>3</sup>, Sreeharsha Nagaraja <sup>1,4</sup>, Katharigatta Narayanaswamy Venugopala <sup>1,5</sup>, Anroop Balachandran Nair <sup>1</sup>, Heba S. Elsewedy <sup>1</sup> and Hamedh Kochkar <sup>6,7</sup>

<sup>1</sup> Department of Pharmaceutical Sciences, College of Clinical Pharmacy, King Faisal University, Al-Ahsa 31982, Saudi Arabia; christophetatat@gmail.com (C.T.); sharsha@kfu.edu.sa (S.N.); kvenugopala@kfu.edu.sa (K.N.V.); Anair@kfu.edu.sa (A.B.N.); helsewedy@kfu.edu.sa (H.S.E.)

<sup>2</sup> School of Pharmacy, Aristotle University of Thessaloniki, 54124 Thessaloniki, Greece; anthi.petrou.thessaloniki1@gmail.com

<sup>3</sup> Mycological Laboratory, Department of Plant Physiology, Institute for Biological Research, Siniša Stanković-National Institute of Republic of Serbia, University of Belgrade, Bulevar Despotina Stefana 142, 11000 Belgrade, Serbia; marija.smiljkovic@ibiss.bg.ac.rs (M.I.); rancic@ibiss.bg.ac.rs (A.Ć.); mris@ibiss.bg.ac.rs (M.S.)

<sup>4</sup> Department of Pharmaceutics, Vidya Siri College of Pharmacy, Off Sarjapura Road, Bengaluru 560 035, Karnataka, India

<sup>5</sup> Department of Biotechnology and Food Technology, Faculty of Applied Sciences, Durban University of Technology, Durban 4001, South Africa

<sup>6</sup> Department of Chemistry, College of Science, Imam Abdulrahman Bin Faisal University, Dammam 31441, Saudi Arabia; hbkochkar@iau.edu.sa

<sup>7</sup> Basic & Applied Scientific Research Center, Imam Abdulrahman Bin Faisal University, Dammam 31441, Saudi Arabia

\* Correspondence: mharoun@kfu.edu.sa (M.H.); geronik@pharm.auth.gr (A.G.); Tel.: +30-2310-997-616 (A.G.)

**Table S1.** PASS prediction results.

| No | Pa    | Pi    | Activity                                        | No | Pa    | Pi    | Activity                                        |
|----|-------|-------|-------------------------------------------------|----|-------|-------|-------------------------------------------------|
| 1  | 0,211 | 0,108 | Antibacterial                                   | 13 | 0,296 | 0,062 | Antibacterial                                   |
|    | 0,416 | 0,066 | Muramoyltetrapeptide carboxypeptidase inhibitor |    | 0,575 | 0,028 | Muramoyltetrapeptide carboxypeptidase inhibitor |
| 2  | 0,454 | 0,053 | Muramoyltetrapeptide carboxypeptidase inhibitor | 14 | 0,337 | 0,047 | Antibacterial                                   |
| 3  | 0,355 | 0,095 | Muramoyltetrapeptide carboxypeptidase inhibitor |    | 0,624 | 0,022 | Muramoyltetrapeptide carboxypeptidase inhibitor |
| 4  | 0,454 | 0,053 | Muramoyltetrapeptide carboxypeptidase inhibitor | 15 | 0,224 | 0,099 | Antibacterial                                   |
| 5  | 0,439 | 0,058 | Muramoyltetrapeptide carboxypeptidase inhibitor |    | 0,437 | 0,058 | Muramoyltetrapeptide carboxypeptidase inhibitor |
| 6  | 0,392 | 0,076 | Muramoyltetrapeptide carboxypeptidase inhibitor | 16 | 0,315 | 0,055 | Antibacterial                                   |
| 7  | 0,314 | 0,125 | Muramoyltetrapeptide carboxypeptidase inhibitor |    | 0,415 | 0,066 | Muramoyltetrapeptide carboxypeptidase inhibitor |
| 8  | 0,400 | 0,073 | Muramoyltetrapeptide carboxypeptidase inhibitor | 17 | 0,277 | 0,069 | Antibacterial                                   |
| 9  | 0,400 | 0,073 | Muramoyltetrapeptide carboxypeptidase inhibitor |    | 0,569 | 0,029 | Muramoyltetrapeptide carboxypeptidase inhibitor |
| 10 | 0,240 | 0,089 | Antibacterial                                   | 18 | 0,238 | 0,090 | Antibacterial                                   |
|    | 0,451 | 0,054 | Muramoyltetrapeptide carboxypeptidase inhibitor |    | 0,451 | 0,054 | Muramoyltetrapeptide carboxypeptidase inhibitor |
| 11 | 0,330 | 0,049 | Antibacterial                                   | 19 | 0,315 | 0,055 | Antibacterial                                   |
|    | 0,429 | 0,061 | Muramoyltetrapeptide carboxypeptidase inhibitor |    | 0,607 | 0,024 | Muramoyltetrapeptide carboxypeptidase inhibitor |
| 12 | 0,226 | 0,097 | Antibacterial                                   |    |       |       |                                                 |
|    | 0,451 | 0,054 | Muramoyltetrapeptide carboxypeptidase inhibitor |    |       |       |                                                 |
